# Supplementary material for: Closure of the Eastern Paleo-Asian Ocean: Evidence from Permian–Triassic Volcanic Rocks in the Northern Margin of the North China Craton
Source: MDPI journal article supplement (doi:10.3390/min13050606), 2023-04-27
Supplement: s1 [file s1]

Archive with 8 entries (8 files):
- Figure S1.pdf
- Figure S2.pdf
- Figure S3.pdf
- Table. S1.xlsx
- Table. S2.xlsx
- Table. S3.xlsx
- Table. S4.xlsx
- Table. S5.pdf
