# Supplementary material for: Closure of the Eastern Paleo-Asian Ocean: Evidence from Permian–Triassic Volcanic Rocks in the Northern Margin of the North China Craton
Source: MDPI journal article supplement (doi:10.3390/min13050606), 2023-04-27
Supplement: s1 [file s1 › Figure S3.pdf]

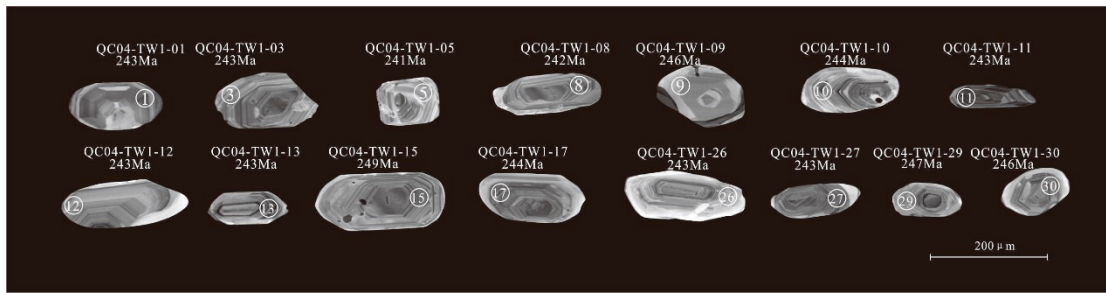

Figure S3. CL images of zircon from the Chaijialing dacites. The white circles indicate the locations of the LA-ICP-MS U-Pb analysis spots.
