# Supplementary material for: Closure of the Eastern Paleo-Asian Ocean: Evidence from Permian–Triassic Volcanic Rocks in the Northern Margin of the North China Craton
Source: MDPI journal article supplement (doi:10.3390/min13050606), 2023-04-27
Supplement: s1 [file s1 › Table. S1.xlsx]

## Sheet: Sheet1
Supplementary Table S1. SHRIMP U-Pb zircon data for the Early Permian andesite in the eastern section of the northern margin of the North China Craton
Spot	Th	U	Th/U	Isotopic ratios						Ages(Ma)				206Pb/204Pb
	ppm	ppm		207Pb/206Pb		207Pb/235U		206Pb/238U		207Pb/206Pb		206Pb/238U
				Ratio	1δ	Ratio	1δ	Ratio	1δ	Ages	1δ	Ages	1δ
BTZTW1-1.1	384.495	501.587	0.766557	0.0532077	4.44274	0.326937	4.583	0.0445645	1.12516	337.671	100.645	281.064	3.09447	18.27
BTZTW1-2.1	101.749	236.231	0.430717	0.0536565	9.84874	0.341679	9.92415	0.0461843	1.22112	356.669	222.361	291.053	3.47506	18.25
BTZTW1-3.1	236.489	382.233	0.618703	0.045866	4.9868	0.285698	5.11991	0.0451768	1.1599	-9	120.419	284.842	3.23195	18.26
BTZTW1-4.1	147.091	273.848	0.537129	0.0501129	6.15348	0.322884	6.27004	0.04673	1.20336	200.241	142.893	294.414	3.46319	18.25
BTZTW1-6.1	188.04	407.131	0.461868	0.0483337	7.82135	0.306222	7.91045	0.04595	1.18395	115.642	184.477	289.609	3.35294	18.26
BTZTW1-7.1	174.805	350.725	0.498411	0.0467898	7.34366	0.294303	7.43151	0.0456186	1.13925	38.5208	175.728	287.566	3.2041	18.26
BTZTW1-8.1	295.09	550.732	0.535813	0.0488922	8.33019	0.300596	8.40765	0.0445905	1.13866	142.672	195.497	281.225	3.13335	18.27
BTZTW1-9.1	186.614	389.435	0.479193	0.0487074	6.50793	0.308895	6.60557	0.0459953	1.13154	133.78	152.982	289.888	3.20755	18.26
BTZTW1-10.1	204.405	369.742	0.552832	0.0485369	7.44579	0.304629	7.53552	0.0455196	1.15939	125.53	175.296	286.955	3.25398	18.26
BTZTW1-11.1	96.6954	195.913	0.493562	0.0513605	7.35789	0.325305	7.48673	0.0459367	1.383	257.051	169.107	289.527	3.91558	18.26
BTZTW1-12.1	114.424	202.684	0.564542	0.0509063	9.45625	0.319345	9.54693	0.0454974	1.31267	236.598	218.14	286.819	3.68247	18.26
