# Supplementary material for: Closure of the Eastern Paleo-Asian Ocean: Evidence from Permian–Triassic Volcanic Rocks in the Northern Margin of the North China Craton
Source: MDPI journal article supplement (doi:10.3390/min13050606), 2023-04-27
Supplement: s1 [file s1 › Table. S2.xlsx]

## Sheet: Sheet1
Supplementary Table S2. LA-ICP-MS U-Pb zircon data for the Permo-Triassic volcanic rocks in the eastern section of the northern margin of the North China Craton
Spot	Th	U	Th/U	Isotopic ratios						Ages(Ma)						206Pb
	ppm	ppm		207Pb/206Pb		207Pb/235U		206Pb/238U		207Pb/206Pb		207Pb/235U		206Pb/238U		Commom Pb
				Ratio	1δ	Ratio	1δ	Ratio	1δ	Ages	1δ	Ages	1δ	Ages	1δ	ppm
QC05-2-TW1-02	88.8717	553.249	0.160636	0.0511571	0.00142445	0.28332	0.00785308	0.0401481	0.000435511	255.62	60.175	253.287	6.21587	253.751	2.7026	1.9
QC05-2-TW1-04	1158.98	1053.02	1.10063	0.160319	0.00212696	9.64316	0.134152	0.433842	0.00358265	2458.94	22.225	2401.3	12.9021	2323.02	16.156	2.99
QC05-2-TW1-05	325.961	468.139	0.69629	0.161612	0.0023916	10.303	0.166645	0.45965	0.00448302	2472.52	25.005	2462.37	15.0636	2438.01	19.8426	1.57
QC05-2-TW1-06	31.3303	683.228	0.0458562	0.163255	0.00258109	10.702	0.177996	0.472586	0.00458089	2500	26.8525	2497.6	15.5379	2494.89	20.0986	0
QC05-2-TW1-08	372.697	1696.71	0.219658	0.164172	0.00230313	11.0354	0.160523	0.484709	0.00416983	2499.07	24.5375	2526.13	13.6512	2547.75	18.157	1.51
QC05-2-TW1-09	145.633	245.443	0.593349	0.168691	0.00244609	11.65	0.173941	0.498556	0.0046895	2546.29	24.3825	2576.69	14.0713	2607.59	20.2221	0.82
QC05-2-TW1-10	173.339	1396.92	0.124087	0.165865	0.00218988	11.645	0.170386	0.507392	0.00592626	2516.36	22.22	2576.29	13.7936	2645.49	25.3841	1.5
QC05-2-TW1-11	248.479	514.484	0.482967	0.0502696	0.00128496	0.278362	0.007443	0.0399912	0.000425508	205.63	59.25	249.358	5.91429	252.778	2.64105	1.8
QC04-TW1-01	826.879	344.22	2.40218	0.0511006	0.00187398	0.271289	0.00940509	0.0384762	0.000451407	255.62	80.5425	243.724	7.5137	243.381	2.80522	0.35
QC04-TW1-03	220.94	317.003	0.696963	0.053711	0.0019079	0.284866	0.00977347	0.0384393	0.00050655	366.72	81.4725	254.51	7.72555	243.152	3.14729	0.75
QC04-TW1-05	179.82	246.153	0.730523	0.0523036	0.00178052	0.276205	0.00954047	0.0381777	0.000541956	298.21	77.77	247.642	7.59252	241.527	3.36772	0.95
QC04-TW1-08	352.305	440.581	0.799637	0.0517021	0.00163524	0.273912	0.00851851	0.0382982	0.000389411	272.285	72.21	245.816	6.79181	242.276	2.42125	0
QC04-TW1-09	30.3431	105.56	0.287449	0.052899	0.00273466	0.284059	0.0144509	0.0389717	0.000654648	324.13	113.875	253.872	11.4285	246.456	4.06401	1.89
QC04-TW1-10	271.075	317.6	0.853513	0.0521796	0.00203901	0.277836	0.0106738	0.038649	0.000555731	300.06	88.8775	248.94	8.48319	244.453	3.45169	0
QC04-TW1-11	562.985	1122.25	0.50166	0.0530259	0.00114927	0.282527	0.00564625	0.0385208	0.00040868	331.54	54.625	252.66	4.47346	243.657	2.54021	0.83
QC04-TW1-12	110.781	227.996	0.48589	0.0523118	0.00196506	0.276883	0.00978466	0.0384617	0.000471655	298.21	87.0275	248.182	7.78263	243.291	2.93082	1.25
QC04-TW1-13	556.74	641.865	0.867378	0.0516305	0.00133143	0.274241	0.00654327	0.0384696	0.000402985	333.39	59.2525	246.079	5.21671	243.34	2.50502	1.25
QC04-TW1-15	273.233	352.096	0.776017	0.052616	0.00169548	0.286842	0.00909245	0.039383	0.000437877	322.28	72.215	256.071	7.17651	249.007	2.71911	0
QC04-TW1-17	319.658	469.712	0.68054	0.0523945	0.00150545	0.280485	0.00809559	0.0386649	0.000431548	301.91	66.66	251.042	6.42181	244.552	2.68163	0.78
QC04-TW1-26	156.472	234.291	0.667852	0.0517817	0.00189972	0.274732	0.00989745	0.0385105	0.000476538	275.99	87.95	246.47	7.88556	243.594	2.96097	0
QC04-TW1-27	419.869	482.174	0.870784	0.0522096	0.00142221	0.276753	0.00721125	0.0384706	0.000404167	294.505	67.585	248.079	5.73748	243.346	2.51235	1.16
QC04-TW1-29	196.773	258.123	0.762326	0.0523073	0.00195406	0.27983	0.00993169	0.0391298	0.000541407	298.21	87.9525	250.523	7.88138	247.437	3.36137	1.48
QC04-TW1-30	272.117	442.824	0.614504	0.0491328	0.00173246	0.263287	0.00900622	0.0389343	0.000419297	153.79	78.69	237.312	7.24066	246.224	2.60507	1.08
