# Supplementary material for: Closure of the Eastern Paleo-Asian Ocean: Evidence from Permian–Triassic Volcanic Rocks in the Northern Margin of the North China Craton
Source: MDPI journal article supplement (doi:10.3390/min13050606), 2023-04-27
Supplement: s1 [file s1 › Table. S3.xlsx]

## Sheet: Sheet1
Supplementary Table. 3 Major(wt％) and trace(ppm) elements of the Permo-Triassic volcanic rocks in the eastern section of the northern margin of the North China Craton
Sample	YQ5642-1	YQ5642-2	YQ5642-3	YQ5642-4	YQ5642-5	YQ5642-6	YQ5642-7	YQ5642-8	YQ5642-9	QC05-1-QY1	QC05-2-QY1	QC05-2-QY2	QC05-2-QY3	QC05-2-QY4	QC04-QY1	QC04-QY2	QC04-QY3
Lithology	Bachagou andesite									Chaijialing andesite					Chaijialing dacite
	Major element (wt.%)
SiO2	59.803	60.664	54.6035	54.691	53.59	51.668	59.578	60.767	60.031	57.7	60.14	58.26	59.2	60.92	67.24	67.76	68.07
TiO2	0.899	0.92	1.2065	1.153	1.204	1.096	0.972	0.9265	0.957	0.93	0.93	0.96	0.89	0.89	0.44	0.43	0.43
Al2O3	15.869	16.244	18.889	18.935	19.109	17.246	16.365	16.1475	16.918	15.7	15.47	16.46	15.28	15.01	15.94	15.9	15.71
FeO	2.86621	2.83926	2.92012	3.03693	2.88418	2.83926	2.74941	2.76289	3.11779	5.4168	5.3898	5.70473	5.60575	4.85892	3.08631	2.84337	2.99633
Fe2O3	3.46426	3.67821	6.80336	6.48258	7.0413	6.14121	3.88405	3.89807	3.78372	6.02	5.99	6.34	6.23	5.4	3.43	3.16	3.33
MnO	0.14	0.134	0.1165	0.12	0.115	0.115	0.161	0.1455	0.13	0.11	0.11	0.1	0.11	0.1	0.05	0.05	0.05
MgO	2.374	2.715	2.359	2.643	2.52	6.61	2.532	2.34	2.78	4.87	4.65	4.92	4.95	5.24	1.41	1.28	1.22
CaO	4.89	4.271	3.4915	3.107	3.43	4.551	5.385	4.4295	3.571	5.89	5.51	4.49	4.61	6.51	2.3	2.74	2.43
Na2O	3.403	3.451	4.2265	3.805	4.247	3.954	3.873	2.953	3	3.38	4.2	3.95	3.68	2.46	4.54	4.25	4.53
K2O	1.999	1.824	2.406	2.744	2.648	2.153	1.312	1.9705	2.378	2.36	1.81	2.06	1.99	1.85	3.14	2.92	3.07
P2O5	0.215	0.215	0.2775	0.213	0.231	0.232	0.213	0.2315	0.248	0.2	0.21	0.22	0.2	0.22	0.13	0.15	0.14
	Trace element (ppm)
Ba	487.9	553.02	762.515	872.71	831.88	821.24	375.79	567.48	747.45	684	336	629	609	464	635	731	565
Rb	49.57	42.52	56.33	61.31	59.7	53.03	32.74	47.555	56.34	68.3	55.9	60.5	60.3	55.4	94.3	74.7	91.1
Sr	374.88	420.04	455.115	406	446.6	456.49	492.87	456.845	375.82	518	597	681	597	484	425	478	424
Zr	182.84	184.77	223.88	214.88	225.95	221.05	191.21	185.81	203.1	175	171	178	165	166	169	165	158
Nb	7.43	7.53	8.65	8.57	8.12	8.9	7.68	7.42	8.92	6.3	6.2	6.4	5.9	5.9	4.5	4.4	4.2
Ni	1.93	3.65	6.445	5.62	4.59	4.98	3.72	4.31	4.87
Co	11.9275	12.9572	14.1145	15.3145	13.8933	14.7698	12.6168	12.5785	12.4636
Cr	18.93	15.74	18.515	17.22	16.83	19.18	21.68	20.47	15.45	160	160	170	160	150	70	70	70
La	17.8013	16.5124	24.1289	19.2409	21.9557	22.0242	18.7336	19.2203	21.1879	22.5	23.2	23.4	22.6	21.9	22.3	19.9	21.8
Ce	36.6411	33.8752	49.6359	39.3718	44.3976	44.6212	38.901	39.3011	42.3967	48.7	47.7	50.7	49.6	44.8	46.1	40.7	45.8
Pr	5.12515	4.81833	6.89716	5.77236	6.34547	6.32116	5.47133	5.53038	5.91709	5.4	5.46	5.58	5.35	5.24	5.15	4.57	5.24
Nd	21.7779	20.1622	29.099	24.4103	27.0201	26.8394	22.7947	23.1054	24.7944	20.4	20.7	21.1	19.5	20.1	19.1	16.5	18.9
Sm	4.92973	4.55302	6.48087	5.57551	6.11366	6.04613	5.11966	5.18825	5.53963	4.43	4.52	4.57	4.33	4.24	3.79	3.35	3.92
Eu	1.57296	1.566	2.16761	2.04711	2.11758	1.98534	1.59384	1.66648	2.01231	1.29	1.4	1.38	1.35	1.19	1.14	1.04	1.12
Gd	4.437	4.01115	5.9058	4.95125	5.4604	5.45955	4.6478	4.6682	4.93255	3.98	3.9	3.98	3.87	3.8	2.94	2.51	3.11
Tb	0.787317	0.728583	1.05909	0.910759	0.991395	0.979449	0.846052	0.829626	0.897818	0.6	0.58	0.6	0.58	0.57	0.39	0.34	0.42
Dy	4.86399	4.45169	6.48957	5.51143	6.22544	6.17068	5.27736	5.1963	5.52539	3.45	3.33	3.45	3.38	3.31	2.08	1.85	2.19
Ho	1.03284	0.954222	1.34463	1.13947	1.26978	1.26009	1.08992	1.08346	1.16424	0.7	0.7	0.69	0.69	0.67	0.39	0.35	0.4
Er	2.8322	2.52154	3.74458	3.1017	3.5427	3.50154	3.02918	3.01924	3.1017	1.86	1.85	1.93	1.79	1.88	0.98	0.89	1.04
Tm	0.448784	0.420938	0.5682	0.491624	0.550529	0.533393	0.46592	0.47663	0.486269	0.27	0.27	0.29	0.26	0.27	0.14	0.13	0.14
Yb	2.93537	2.71749	3.7763	3.25521	3.67595	3.57828	3.12212	3.10495	3.22838	1.71	1.75	1.79	1.65	1.64	0.89	0.86	0.87
Lu	0.43904	0.4088	0.56168	0.49728	0.54656	0.53424	0.48048	0.46928	0.48384	0.26	0.27	0.27	0.25	0.25	0.14	0.14	0.14
Y	25.3352	26.2152	33.836	28.0808	32.6832	32.5248	27.7024	27.4736	28.116	17.8	18.2	18.7	17.8	17.7	10.8	10	11.2
Cs															2.2	2.15	2.18
Ta	0.402254	0.581605	0.541405	0.563051	0.446783	0.535839	0.418334	0.403491	0.438124	0.4	0.4	0.4	0.4	0.4	0.3	0.2	0.3
Hf	4.96292	4.66506	6.26036	5.6445	5.82894	5.99642	5.42932	5.67683	5.74732	4.1	4	4.2	4	3.9	4.3	4.2	4.1
Th	2.90495	2.36544	2.39825	2.79095	2.87645	2.6114	2.24062	2.32569	2.33267	5.54	5.44	5.95	5.53	5.28	7.85	7.3	7.31
U	0.754	0.776	0.8585	0.719	0.833	0.814	0.904	0.8485	0.872	1.6	1.58	1.66	1.58	1.63	2.35	2.18	2.28
δEu	1.00919	1.09724	1.05255	1.16757	1.09891	1.0372	0.98122	1.01605	1.15392	0.921682	0.996282	0.967743	0.988895	0.88921	1.00757	1.05317	0.94911
Mg#	57.5817	59.3853	40.7182	44.6789	41.4842	68.0726	56.3575	54.3197	59.2737	61.5752	60.5952	60.5869	61.1486	65.7793	44.8825	44.5181	42.0537

## Sheet: Sheet2
Table. S3 Major(wt％) and trace(ppm) elements of the Permo-Triassic volcanic rocks in the eastern section of the northern margin of the North China Craton
Sample	YQ5642-1	YQ5642-2	YQ5642-3	YQ5642-4	YQ5642-5	YQ5642-6	YQ5642-7	YQ5642-8	YQ5642-9
Lithology	Bachagou andesite
Major element (wt.%)
SiO2	59.803	60.664	54.6035	54.691	53.59	51.668	59.578	60.767	60.031
TiO2	0.899	0.92	1.2065	1.153	1.204	1.096	0.972	0.9265	0.957
Al2O3	15.869	16.244	18.889	18.935	19.109	17.246	16.365	16.1475	16.918
FeO	2.86621	2.83926	2.92012	3.03693	2.88418	2.83926	2.74941	2.76289	3.11779
Fe2O3	3.46426	3.67821	6.80336	6.48258	7.0413	6.14121	3.88405	3.89807	3.78372
MnO	0.14	0.134	0.1165	0.12	0.115	0.115	0.161	0.1455	0.13
MgO	2.374	2.715	2.359	2.643	2.52	6.61	2.532	2.34	2.78
CaO	4.89	4.271	3.4915	3.107	3.43	4.551	5.385	4.4295	3.571
Na2O	3.403	3.451	4.2265	3.805	4.247	3.954	3.873	2.953	3
K2O	1.999	1.824	2.406	2.744	2.648	2.153	1.312	1.9705	2.378
P2O5	0.215	0.215	0.2775	0.213	0.231	0.232	0.213	0.2315	0.248
Trace element (ppm)
Ba	487.9	553.02	762.515	872.71	831.88	821.24	375.79	567.48	747.45
Rb	49.57	42.52	56.33	61.31	59.7	53.03	32.74	47.555	56.34
Sr	374.88	420.04	455.115	406	446.6	456.49	492.87	456.845	375.82
Zr	182.84	184.77	223.88	214.88	225.95	221.05	191.21	185.81	203.1
Nb	7.43	7.53	8.65	8.57	8.12	8.9	7.68	7.42	8.92
Ni	1.93	3.65	6.445	5.62	4.59	4.98	3.72	4.31	4.87
Co	11.9275	12.9572	14.1145	15.3145	13.8933	14.7698	12.6168	12.5785	12.4636
Cr	18.93	15.74	18.515	17.22	16.83	19.18	21.68	20.47	15.45
La	17.8013	16.5124	24.1289	19.2409	21.9557	22.0242	18.7336	19.2203	21.1879
Ce	36.6411	33.8752	49.6359	39.3718	44.3976	44.6212	38.901	39.3011	42.3967
Pr	5.12515	4.81833	6.89716	5.77236	6.34547	6.32116	5.47133	5.53038	5.91709
Nd	21.7779	20.1622	29.099	24.4103	27.0201	26.8394	22.7947	23.1054	24.7944
Sm	4.92973	4.55302	6.48087	5.57551	6.11366	6.04613	5.11966	5.18825	5.53963
Eu	1.57296	1.566	2.16761	2.04711	2.11758	1.98534	1.59384	1.66648	2.01231
Gd	4.437	4.01115	5.9058	4.95125	5.4604	5.45955	4.6478	4.6682	4.93255
Tb	0.787317	0.728583	1.05909	0.910759	0.991395	0.979449	0.846052	0.829626	0.897818
Dy	4.86399	4.45169	6.48957	5.51143	6.22544	6.17068	5.27736	5.1963	5.52539
Ho	1.03284	0.954222	1.34463	1.13947	1.26978	1.26009	1.08992	1.08346	1.16424
Er	2.8322	2.52154	3.74458	3.1017	3.5427	3.50154	3.02918	3.01924	3.1017
Tm	0.448784	0.420938	0.5682	0.491624	0.550529	0.533393	0.46592	0.47663	0.486269
Yb	2.93537	2.71749	3.7763	3.25521	3.67595	3.57828	3.12212	3.10495	3.22838
Lu	0.43904	0.4088	0.56168	0.49728	0.54656	0.53424	0.48048	0.46928	0.48384
Y	25.3352	26.2152	33.836	28.0808	32.6832	32.5248	27.7024	27.4736	28.116
Ta	0.402254	0.581605	0.541405	0.563051	0.446783	0.535839	0.418334	0.403491	0.438124
Hf	4.96292	4.66506	6.26036	5.6445	5.82894	5.99642	5.42932	5.67683	5.74732
Th	2.90495	2.36544	2.39825	2.79095	2.87645	2.6114	2.24062	2.32569	2.33267
U	0.754	0.776	0.8585	0.719	0.833	0.814	0.904	0.8485	0.872
δEu	1.00919	1.09724	1.05255	1.16757	1.09891	1.0372	0.98122	1.01605	1.15392
Mg#	57.5817	59.3853	40.7182	44.6789	41.4842	68.0726	56.3575	54.3197	59.2737
Sample	QC05-1-QY1	QC05-2-QY1	QC05-2-QY2	QC05-2-QY3	QC05-2-QY4	QC04-QY1	QC04-QY2	QC04-QY3
Lithology	Chaijialing andesite					Chaijialing dacite
Major element (wt.%)
SiO2	57.7	60.14	58.26	59.2	60.92	67.24	67.76	68.07
TiO2	0.93	0.93	0.96	0.89	0.89	0.44	0.43	0.43
Al2O3	15.7	15.47	16.46	15.28	15.01	15.94	15.9	15.71
FeO	5.4168	5.3898	5.70473	5.60575	4.85892	3.08631	2.84337	2.99633
Fe2O3	6.02	5.99	6.34	6.23	5.4	3.43	3.16	3.33
MnO	0.11	0.11	0.1	0.11	0.1	0.05	0.05	0.05
MgO	4.87	4.65	4.92	4.95	5.24	1.41	1.28	1.22
CaO	5.89	5.51	4.49	4.61	6.51	2.3	2.74	2.43
Na2O	3.38	4.2	3.95	3.68	2.46	4.54	4.25	4.53
K2O	2.36	1.81	2.06	1.99	1.85	3.14	2.92	3.07
P2O5	0.2	0.21	0.22	0.2	0.22	0.13	0.15	0.14
Trace element (ppm)
Ba	684	336	629	609	464	635	731	565
Rb	68.3	55.9	60.5	60.3	55.4	94.3	74.7	91.1
Sr	518	597	681	597	484	425	478	424
Zr	175	171	178	165	166	169	165	158
Nb	6.3	6.2	6.4	5.9	5.9	4.5	4.4	4.2
Cr	160	160	170	160	150	70	70	70
La	22.5	23.2	23.4	22.6	21.9	22.3	19.9	21.8
Ce	48.7	47.7	50.7	49.6	44.8	46.1	40.7	45.8
Pr	5.4	5.46	5.58	5.35	5.24	5.15	4.57	5.24
Nd	20.4	20.7	21.1	19.5	20.1	19.1	16.5	18.9
Sm	4.43	4.52	4.57	4.33	4.24	3.79	3.35	3.92
Eu	1.29	1.4	1.38	1.35	1.19	1.14	1.04	1.12
Gd	3.98	3.9	3.98	3.87	3.8	2.94	2.51	3.11
Tb	0.6	0.58	0.6	0.58	0.57	0.39	0.34	0.42
Dy	3.45	3.33	3.45	3.38	3.31	2.08	1.85	2.19
Ho	0.7	0.7	0.69	0.69	0.67	0.39	0.35	0.4
Er	1.86	1.85	1.93	1.79	1.88	0.98	0.89	1.04
Tm	0.27	0.27	0.29	0.26	0.27	0.14	0.13	0.14
Yb	1.71	1.75	1.79	1.65	1.64	0.89	0.86	0.87
Lu	0.26	0.27	0.27	0.25	0.25	0.14	0.14	0.14
Y	17.8	18.2	18.7	17.8	17.7	10.8	10	11.2
Ta	0.4	0.4	0.4	0.4	0.4	0.3	0.2	0.3
Hf	4.1	4	4.2	4	3.9	4.3	4.2	4.1
Th	5.54	5.44	5.95	5.53	5.28	7.85	7.3	7.31
U	1.6	1.58	1.66	1.58	1.63	2.35	2.18	2.28
δEu	0.921682	0.996282	0.967743	0.988895	0.88921	1.00757	1.05317	0.94911
Mg#	61.5752	60.5952	60.5869	61.1486	65.7793	44.8825	44.5181	42.0537
