# Supplementary material for: Closure of the Eastern Paleo-Asian Ocean: Evidence from Permian–Triassic Volcanic Rocks in the Northern Margin of the North China Craton
Source: MDPI journal article supplement (doi:10.3390/min13050606), 2023-04-27
Supplement: s1 [file s1 › Table. S4.xlsx]

## Sheet: Sheet1
Supplementary Table. S4 In situ zircon Hf isotopic compositions for the Permo-Triassic volcanic rocks in the eastern section of the Northern margin of the North China Craton
Sample No.	Age (Ma)	176Yb/177Hf	176Lu/177Hf	176Hf/177Hf	2σ	176Hf/177Hfi	eHf(0)	eHf(t)	TDM (Ma)	TDMC (Ma)	fLu/Hf
BTZ.1.1	281	0.124872	0.0033175	0.282967	2.90841e-05	0.28295	6.89541	12.4558	430.822	598.644	-0.900075
BTZ.2.1	291	0.135305	0.00342314	0.282913	3.83341e-05	0.282894	4.97294	10.7103	514.722	763.9	-0.896893
BTZ.3.1	285	0.106487	0.002846	0.283055	3.9e-05	0.28304	10	15.7467	292.938	302.055	-0.914281
BTZ.4.1	294	0.104596	0.00290228	0.282958	3.98956e-05	0.282942	6.57935	12.4784	439.194	605.464	-0.912582
BTZ.6.1	290	0.078663	0.00264	0.283021	0.00034	0.283007	8.8	14.6818	342.027	402.427	-0.920478
BTZ.7.1	288	0.109791	0.0028758	0.282938	2.74462e-05	0.282923	5.87385	11.6567	468.725	675.973	-0.913379
BTZ.8.1	281	0.114047	0.003238	0.283049	0.00035	0.283032	9.8	15.3601	306.184	334.514	-0.902472
BTZ.9.1	290	0.107754	0.00304213	0.282875	3.37981e-05	0.282859	3.64585	9.4357	565.542	878.76	-0.90837
BTZ.10.1	287	0.0887134	0.00240618	0.282962	3.61999e-05	0.282949	6.70449	12.557	427.935	593.541	-0.927525
BTZ.11.1	290	0.106144	0.00282726	0.282935	4.16161e-05	0.28292	5.75947	11.5919	472.921	683.222	-0.914842
