# Supplementary material for: Closure of the Eastern Paleo-Asian Ocean: Evidence from Permian–Triassic Volcanic Rocks in the Northern Margin of the North China Craton
Source: MDPI journal article supplement (doi:10.3390/min13050606), 2023-04-27
Supplement: s1 [file s1 › Table. S5.pdf]

Table S5 Geochronological data for Permo-Triassic igneous rocks in the Faku-Yanji Area.

| No.                                   | Sample    | Sample location             | Rock type         | Method    | Age(Ma)     | References            |
|---------------------------------------|-----------|-----------------------------|-------------------|-----------|-------------|-----------------------|
| <i>Early Permian(293-273Ma)</i>       |           |                             |                   |           |             |                       |
| 1                                     | JK11-1    | Beishantun                  | Meta-dacite       | LA-ICP-MS | 293 ± 2     | Cao et al. 2012 [63]  |
| 2                                     | BTZ1      | N 42°34'40"E 123°13'01"     | Andesite          | SHRIMP    | 287 ± 2     | This study            |
| 3                                     | JK11-4    | Beishantun                  | Rhyolite          | LA-ICP-MS | 286 ± 2     | Cao et al. 2012[63]   |
| 4                                     | YZ02-12-3 | N 42°28'46"E 128°56'12"     | Tonalite          | LA-ICP-MS | 285 ± 9     | Zhang et al. 2004[41] |
| 5                                     | R20       | Yanbian                     | Gabbro            | SHRIMP    | 284.5 ± 2.5 | Guo et al. 2016[65]   |
| 6                                     | FK51      | N 42°30'13"E 123°25'53"     | Granodiorite      | SHRIMP    | 284 ± 3     | Zhang et al. 2005[39] |
| 7                                     | D2344TW1  | N 42°33'06",E 123°00'20"    | Monzogranite      | SHRIMP    | 283 ± 2     | Shi et al. 2020[26]   |
| 8                                     | YH8-1     | Hunchun                     | Gabbro            | LA-ICP-MS | 282 ± 2     | Cao et al. 2011[64]   |
| 9                                     | 16YT1-7   | N 43°30'27"E 125°03'54"     | Andesite          | LA-ICP-MS | 280 ± 1     | Zhou et al. 2018[66]  |
| 10                                    | 13YT10-1  | N 43°30'27"E 125°03'54"     | Basaltic andesite | LA-ICP-MS | 279 ± 1     | Zhou et al. 2018[66]  |
| 11                                    | JH4-1     | Changshanxiang              | Rhyolite          | LA-ICP-MS | 279 ± 3     | Cao et al. 2012[63]   |
| 12                                    | YB03-253  | N 43°34'49"E 129°54'06"     | Tonalite          | LA-ICP-MS | 277 ± 3     | Wu et al. 2011[10]    |
| 13                                    | PM504-2-1 | N 42°10'03"E 122°58'05"     | syenogranite      | SHRIMP    | 276 ± 4     | Shi et al. 2020[26]   |
| 14                                    | 16FK024   | N 43°33'46"E 123°18'22"     | Rhyolite          | LA-ICP-MS | 275.2 ± 1.9 | Jing et al. 2020[67]  |
| 15                                    | YH15-1    | Guanmenjuzi                 | Basaltic andesite | LA-ICP-MS | 275 ± 7     | Cao et al. 2012[63]   |
| 16                                    | 16FK011   | N 42°31'48.1"E 123°16'02.8" | Dacite            | LA-ICP-MS | 274.2 ± 2.1 | Jing et al. 2020[67]  |
| 17                                    | 17FK002   | N 43°31'29"E 123°15'23"     | Rhyolite          | LA-ICP-MS | 274.7 ± 1.7 | Jing et al. 2020[67]  |
| 18                                    | 06HCH-55  | N 42°58'08"E 130°55'25"     | Gabbro            | LA-ICP-MS | 273 ± 2     | Guo et al. 2016[65]   |
| <i>Middle-Late Permian(270-252Ma)</i> |           |                             |                   |           |             |                       |
| 19                                    | LK12-1    | N 46°21'07"E 124°45'50"     | Garnet monzonite  | LA-ICP-MS | 270 ± 1     | Cao et al. 2013[36]   |
| 20                                    | 16FK016   | N 42°32'26"E 123°15'42"     | Andesite          | LA-ICP-MS | 267.3 ± 0.9 | Jing et al. 2020[67]  |
| 21                                    | DXLC-TW1  | N 42°35'33"E 123°17'41"     | Granite           | LA-ICP-MS | 267 ± 6     | Shi et al. 2020[26]   |

| No. | Sample   | Sample location             | Rock type               | Method    | Age(Ma)     | References            |
|-----|----------|-----------------------------|-------------------------|-----------|-------------|-----------------------|
| 22  | DR40     | N 42°29'38"E 123°15'00"     | Dacite                  | SHRIMP    | 267 ± 3     | Liu et al. 2016[74]   |
| 23  | 16FK001  | N 42°29'36.8"E 123°16'16.1" | Andesite                | LA-ICP-MS | 266.9 ± 3.5 | Jing et al. 2020[67]  |
| 24  | RZ39     | N 42°32'12"E 124°28'50"     | Gabbro–diorite          | LA-ICP-MS | 266 ± 2     | Liu et al. 2019[28]   |
| 25  | YB03–188 | N 43°30'29"E 129°24'29"     | Monzogranite            | LA-ICP-MS | 266 ± 3     | Wu et al. 2011[10]    |
| 26  | FK53     | N 42°29'49"E 123°15'45"     | Granodiorite            | SHRIMP    | 265 ± 4     | Zhang et al. 2005[39] |
| 27  | D6219TW1 | N 42°29'41"E 123°10'45"     | Granodiorite            | SHRIMP    | 265 ± 1     | Shi et al. 2020[26]   |
| 28  | FW00–121 | N 42°58'11"E 125°51'48"     | Quartz syenite          | SHRIMP    | 264 ± 5     | Wu et al. 2011[10]    |
| 29  | QJM-TW2  | N 42°32'1"E 123°18'12"      | Granodiorite            | LA-ICP-MS | 263 ± 4     | Shi et al. 2020[26]   |
| 30  | 09HC–26  | N 43°40'11"E 129°55'30"     | Diorite                 | LA-ICP-MS | 263 ± 3     | Guo et al. 2016[65]   |
| 31  | SMZG–1   | N 43°05'24"E 127°52'42"     | Granodiorite            | LA-ICP-MS | 263 ± 1     | Liu et al. 2010[81]   |
| 32  | JK17–1   | N 43°11'23"E 126°26'45"     | Amphibole gabbro        | LA-ICP-MS | 263 ± 1     | Zhang et al. 2014[25] |
| 33  | 11LK24–1 | N 43°02'32"E 124°29'33"     | Syenogranite            | LA-ICP-MS | 262 ± 2     | Cao et al. 2013[36]   |
| 34  | SMZM–1   | N 43°05'24"E 127°52'42"     | Gabbro                  | LA-ICP-MS | 262 ± 1     | Liu et al. 2010[81]   |
| 35  | XNC–57   | N 43°10'E 130°58'           | Granodiorite            | LA-ICP-MS | 261 ± 5     | Ma et al. 2019[75]    |
| 36  | MG–143   | N 42°16'10"E 124°46'52"     | Monzogranite            | SHRIMP    | 261 ± 20    | Wu et al. 2011[10]    |
| 37  | FK04–19  | N 42°22'E 123°29'           | Monzodiorite            | SHRIMP    | 261 ± 2     | Zhang et al. 2010[38] |
| 38  | YB03-77  | N 44°08'49"E 130°44'52"     | Syenogranite            | LA-ICP-MS | 261 ± 4     | Wu et al. 2011[10]    |
| 39  | D1694TW1 | N 42°29'51"E 123°14'49"     | Granodiorite            | SHRIMP    | 261 ± 1     | Shi et al. 2020[26]   |
| 40  | CK91     | N 42°37'37"E 124°25'53"     | Migmatized diorite      | LA-ICP-MS | 260.8 ± 3.8 | Gu et al., 2018[72]   |
| 41  | XNC–43   | N 43°11'E 130°56'           | Diorite                 | LA-ICP-MS | 260 ± 6     | Ma et al. 2019[75]    |
| 42  | 11LK15–1 | N 42°43'47"E 124°13'06"     | Gabbro                  | LA-ICP-MS | 260 ± 5     | Cao et al. 2013[36]   |
| 43  | DY124–2  | N 43°05'57"E 125°50'52"     | Alkali feldspar granite | LA-ICP-MS | 260 ± 3     | Wu et al. 2011[10]    |
| 44  | RZ38     | N 42°33'16"E 124°27'15"     | Monzodiorite            | LA-ICP-MS | 260 ± 2     | Liu et al. 2019[28]   |
| 45  | FW00–45  | N 42°54'19"E 128°23'19"     | Quartz diorite          | LA-ICP-MS | 260 ± 2     | Wu et al. 2011[10]    |
| 46  | 12JL1–1  | N 43°23'56"E 126°01'10"     | Syenogranite            | LA-ICP-MS | 260 ± 1     | Cao et al. 2013[36]   |

| <i>No.</i> | <i>Sample</i> | <i>Sample location</i>  | <i>Rock type</i>        | <i>Method</i> | <i>Age(Ma)</i> | <i>References</i>     |
|------------|---------------|-------------------------|-------------------------|---------------|----------------|-----------------------|
| 47         | 12JL1-1       | N 43°23'09"E 126°01'17" | Biotite monzogranite    | LA-ICP-MS     | 260 ± 1        | Wang et al. 2015[71]  |
| 48         | CK70          | N 42°32'43"E 124°28'57" | Deformed granodiorite   | LA-ICP-MS     | 259.1 ± 3.1    | Gu et al., 2018[72]   |
| 49         | XNC-77        | N 43°03'E 130°57'       | Tonalite                | LA-ICP-MS     | 259 ± 7        | Ma et al. 2019[75]    |
| 50         | LK36-1        | N 42°52'12"E 125°44'41" | Biotite syenogranite    | LA-ICP-MS     | 259 ± 2        | Cao et al. 2013[36]   |
| 51         | DY126-2       | N 42°54'26"E 125°50'28" | Syenogranite            | LA-ICP-MS     | 259 ± 3        | Wu et al. 2011[10]    |
| 52         | LK37-1        | N 46°21'07"E 131°56'44" | Olivine gabbro          | SIMS          | 258 ± 2        | Cao et al. 2013[36]   |
| 53         | HJT-TW1       | N 42°38'42"E 123°34'40" | Granite                 | LA-ICP-MS     | 258 ± 3        | Shi et al. 2020[26]   |
| 54         | N-8           | N 42°39'24"E 129°06'27" | Quartz diorite          | LA-ICP-MS     | 258 ± 0.9      | Guan et al. 2016[78]  |
| 55         | CK09          | N 42°16'27"E 123°30'39" | Deformed granite        | LA-ICP-MS     | 257.5 ± 4.0    | Gu et al., 2018[72]   |
| 56         | XNC-12        | N 43°14'E 130°57'       | Dioritic enclave        | LA-ICP-MS     | 257 ± 4        | Ma et al., 2019[75]   |
| 57         | LK25-9        | N 43°26'37"E 124°54'02" | Monzogabbro             | SIMS          | 257 ± 2        | Cao et al. 2013[36]   |
| 58         | XNC-98        | N 43°04'E 130°59'       | Gabbroic enclave        | LA-ICP-MS     | 257 ± 6        | Ma et al., 2019[75]   |
| 59         | FX06-59       | northwestern Liaoning   | Mafic rocks             | LA-ICP-MS     | 257 ± 4        | Zhang et al. 2012[15] |
| 60         | 09HC-18       | N 43°01'11"E 130°58'25" | Gabbro                  | LA-ICP-MS     | 257 ± 2        | Guo et al. 2016[65]   |
| 61         | YB03-238      | N 43°39'43"E 130°08'52" | Diorite                 | LA-ICP-MS     | 257 ± 5        | Wu et al. 2011[10]    |
| 62         | CK18          | N 42°30'11"E 124°08'38" | Weakly deformed granite | LA-ICP-MS     | 256.6 ± 2.8    | Gu et al., 2018[72]   |
| 63         | DST1          | N 43°30'32"E 125°07'37" | Syenogranite            | LA-ICP-MS     | 256.5 ± 3.3    | Song et al., 2018[73] |
| 64         | 14SP12-1      | N 43°32'39"E 125°04'29" | Monzogranite            | LA-ICP-MS     | 256 ± 2        | Zhou et al., 2018[66] |
| 65         | FX06-21       | N 42°15'42"E 121°47'32" | Monzogranite            | LA-ICP-MS     | 256 ± 4        | Zhang et al. 2012[15] |
| 66         | 11JJH4-1      | N 43°59'76"E 127°20'84" | Gabbro-diorite          | LA-ICP-MS     | 256 ± 2        | Wang et al. 2013[70]  |
| 67         | SD7           | N 43°36'37"E 125°13'22" | Andesite                | LA-ICP-MS     | 255.5 ± 3      | Song et al. 2018[73]  |
| 68         | DYS2          | N 43°34'33"E 125°06'05" | Rhyodacite              | LA-ICP-MS     | 255.4 ± 4.2    | Song et al., 2018[73] |
| 69         | YH7-1         | Hunchun                 | Diorite                 | LA-ICP-MS     | 255 ± 3        | Cao et al. 2011[64]   |
| 70         | LK24-1        | N 42°55'23"E 124°34'18" | Deformed granodiorite   | LA-ICP-MS     | 255 ± 2        | Cao et al. 2013[36]   |

| No.                                                   | Sample   | Sample location         | Rock type                   | Method    | Age(Ma)     | References            |
|-------------------------------------------------------|----------|-------------------------|-----------------------------|-----------|-------------|-----------------------|
| 71                                                    | XQ1      | N 43°34'49"E 125°14'58" | Rhyolite                    | LA-ICP-MS | 254.7 ± 2.6 | Song et al. 2018[73]  |
| 72                                                    | DYS1     | N 43°34'33"E 125°06'05" | Rhyodacite                  | LA-ICP-MS | 254.3 ± 2.5 | Song et al., 2018[73] |
| 73                                                    | MG-119   | N 42°17'48"E 124°45'34" | Monzogranite                | SHRIMP    | 254 ± 8     | Wu et al. 2011[10]    |
| 74                                                    | XDM1     | N 43°36'32"E 125°15'00" | Andesite                    | LA-ICP-MS | 254 ± 3.6   | Song et al. 2018[73]  |
| 75                                                    | FX06-18  | northwestern Liaoning   | Mafic rock                  | LA-ICP-MS | 254 ± 3     | Zhang et al. 2012[15] |
| 76                                                    | 09HCH-12 | N 43°01'09"E 130°19'25" | Gabbro                      | LA-ICP-MS | 254 ± 3     | Guo et al. 2016[65]   |
| 77                                                    | QC05-1   | N 42°32'40"E 124°21'36" | Andesite                    | LA-ICP-MS | 253.3 ± 3.7 | This study            |
| 78                                                    | XDC1     | N 43°37'10"E 125°16'15" | Basaltic lava               | LA-ICP-MS | 253 ± 4.5   | Song et al. 2018[73]  |
| 79                                                    | FW00-104 | N 43°01'30"E 129°28'24" | Alkali feldspar granite     | LA-ICP-MS | 253 ± 2     | Wu et al. 2011[10]    |
| 80                                                    | FW02-191 | N 43°06'43"E 128°00'53" | Alkali feldspar granite     | LA-ICP-MS | 253 ± 2     | Wu et al. 2011[10]    |
| 81                                                    | FW02-194 | N 43°26'46"E 128°27'16" | Quartz diorite              | LA-ICP-MS | 253 ± 2     | Wu et al. 2011[10]    |
| 82                                                    | B4135-2  | Yongxin                 | Granite                     | LA-ICP-MS | 252.8 ± 0.7 | Shi et al., 2013[76]  |
| 83                                                    | CK17     | N 42°31'41"E 124°08'59" | Deformed granite            | LA-ICP-MS | 252.3 ± 3.9 | Chen et al. 2006[68]  |
| 84                                                    | JH3S-1   | N 43°00'55"E 127°09'45" | Dacite                      | SHRIMP    | 252 ± 5     | Li et al. 2007[69]    |
| 85                                                    | FX06-52  | N 42°17'36"E 121°38'38" | Mafic rock                  | LA-ICP-MS | 252 ± 2     | Zhang et al. 2012[15] |
| 86                                                    | 13JH1-1  | N 43°26'42"E 125°59'53" | Quartz monzonite            | LA-ICP-MS | 252 ± 1     | Wang et al. 2015[71]  |
| 87                                                    | 13JH3-1  | N 43°59'42"E 127°20'48" | Hornblende gabbro           | LA-ICP-MS | 252 ± 1     | Wang et al. 2015[71]  |
| 88                                                    | JK13-1   | N 42°58'59"E 127°41'31" | Mylonitized<br>monzogranite | LA-ICP-MS | 252 ± 1     | Wang et al. 2015[71]  |
| 89                                                    | DY143-2  | N 43°02'31"E 125°06'22" | Monzogranite                | LA-ICP-MS | 252 ± 2     | Wu et al. 2011[10]    |
| 90                                                    | CK30     | N 42°10'56"E 123°34'05" | Weakly deformed<br>granite  | LA-ICP-MS | 251.5 ± 4.1 | Gu et al., 2018[72]   |
| 91                                                    | B4117-1  | N 42°39'37"E 129°19'48" | Amphibole gabbro            | LA-ICP-MS | 251.1 ± 1.0 | Zhang et al. 2014[25] |
| <b><i>Late Permian-Middle Triassic(251-240Ma)</i></b> |          |                         |                             |           |             |                       |
| 92                                                    | RZ08     | N 42°25'10"E 124°40'40" | Monzogranite                | LA-ICP-MS | 251 ± 1     | Liu et al. 2019[28]   |

| No. | Sample    | Sample location             | Rock type                  | Method    | Age(Ma)     | References             |
|-----|-----------|-----------------------------|----------------------------|-----------|-------------|------------------------|
| 93  | DY123-4   | N 43°06'40"E 125°57'29"     | Alkali feldspar granite    | LA-ICP-MS | 251 ± 2     | Wu et al. 2011[10]     |
| 94  | YZ02-49   | N 42°39'39"E 129°30'00"     | Quartz diorite             | LA-ICP-MS | 251 ± 2     | Zhang et al. 2004[41]  |
| 95  | CK66      | N 42°29'54"E 124°28'23"     | Migmatized<br>granodiorite | LA-ICP-MS | 250.5 ± 2.9 | Gu et al., 2018[72]    |
| 96  | KY13-12-4 | N 42°34'25"E 124°17'31"     | Basaltic andesite          | LA-ICP-MS | 250 ± 4     | Yuan et al. 2016[79]   |
| 97  | YH2-1     | Tumen                       | Basalt                     | LA-ICP-MS | 250 ± 5     | Cao et al. 2012[63]    |
| 98  |           | N 42°25'48"E 124°41'46"     | Rhyolite                   | SHRIMP    | 250 ± 5     | Chen et al. 2006[68]   |
| 99  | DGTW03    | N 42°34'21"E 123°11'36"     | Granitic mylonite          | SHRIMP    | 250 ± 3     | Shi et al. 2020[26]    |
| 100 | 14YB27-1  | N 42°45'34.4"E 130°18'29.8" | Tonalite                   | LA-ICP-MS | 249 ± 6     | Yang et al. 2017[80]   |
| 101 | HL-1      | N 42°35'20"E 129°10'08"     | Granite                    | LA-ICP-MS | 249 ± 1.1   | Shi et al. 2020[26]    |
| 102 | 13YB3-2   | N 42°46'13"E 128°52'20"     | Quartz monzonite           | LA-ICP-MS | 249 ± 1     | Wang et al. 2015[71]   |
| 103 | LK04-2    | N 42°49'21"E 124°25'25"     | Biotite monzonite          | LA-ICP-MS | 249 ± 1     | Cao et al. 2013[36]    |
| 104 | KY12-33-4 | N 42°34'57"E 124°15'24"     | Andesite                   | LA-ICP-MS | 249         | Yuan et al. 2016[79]   |
| 105 | FK04-24   | N 42°23'E 123°27'           | Granite                    | LA-ICP-MS | 249 ± 2     | Zhang et al., 2010[38] |
| 106 | YZ02-2    | N 42°52'15"E 128°30'32"     | Monzogranite               | LA-ICP-MS | 249 ± 4     | Zhang et al., 2004[41] |
| 107 | FK06-39   | N 42°21'E 123°27'           | Quartz monzonite           | LA-ICP-MS | 248 ± 2     | Zhang et al., 2010[38] |
| 108 | 9923-1    | Dayushan                    | Granite                    | TIMS      | 248 ± 4     | Sun et al. 2004[35]    |
| 109 | 14YB32    | N 42°43'18.8"E 130°15'01.3" | Monzogranite               | LA-ICP-MS | 248 ± 5     | Yang et al. 2017[80]   |
| 110 | YZ02-27-2 | N 42°03'10"E 128°49'32"     | Monzogranite               | LA-ICP-MS | 248 ± 2     | Zhang et al., 2004[41] |
| 111 | BJGC-TW1  | N 42°34'5"E 123°36'20"      | Granite                    | LA-ICP-MS | 248 ± 2     | Shi et al. 2020[26]    |
| 112 | 12LY2-1   | N 43°02'42"E 125°24'13"     | Biotite monzonite          | LA-ICP-MS | 247 ± 1     | Cao et al. 2011[64]    |
| 113 | FW00-34   | N 43°08'45"E 127°53'47"     | Diorite                    | SHRIMP    | 247 ± 1     | Wu et al. 2011[10]     |
| 114 | FW00-110  | N 43°07'33"E 128°51'02"     | Monzogranite               | TIMS      | 247 ± 1     | Wu et al. 2011[10]     |
| 115 | YZ02-40   | N 42°11'05"E 129°09'22"     | Granodiorite               | LA-ICP-MS | 246 ± 3     | Wu et al. 2011[10]     |
| 116 | YZ02-22-2 | N 42°12'14"E 128°49'21"     | Monzogranite               | LA-ICP-MS | 245 ± 6     | Zhang et al. 2004[41]  |

| No. | Sample     | Sample location             | Rock type       | Method    | Age(Ma)     | References            |
|-----|------------|-----------------------------|-----------------|-----------|-------------|-----------------------|
| 117 | YZ02-25-2  | N 42°10'57"E 128°44'58"     | Monzogranite    | LA-ICP-MS | 245 ± 3     | Zhang et al. 2004[41] |
| 118 | 13JH28-1   | N 42°45'59.2"E 128°57'31.1" | Monzogranite    | LA-ICP-MS | 245 ± 1     | Wang et al. 2015[71]  |
| 119 | D6008TW1   | N 42°9'02"E 123°13'59"      | Monzogranite    | SHRIMP    | 245 ± 2     | Shi et al. 2020[26]   |
| 120 | QC04       | N 42°32'43"E 124°22'05"     | Dacite          | LA-ICP-MS | 244.3 ± 1.3 | This study            |
| 121 | b5157-1    | N 42°37'26"E 129°19'49"     | Monzogranite    | LA-ICP-MS | 243 ± 1     | Guan et al. 2016[78]  |
| 122 | MG-28      | N 42°22'19"E 124°55'44"     | Granodiorite    | SHRIMP    | 243 ± 5     | Wu et al. 2011[10]    |
| 123 | MG-103     | N 42°25'11"E 124°40'46"     | Granodiorite    | SHRIMP    | 243 ± 5     | Wu et al. 2011[10]    |
| 124 | MG-64      | N 42°32'52"E 125°11'14"     | Monzogranite    | SHRIMP    | 242 ± 7     | Wu et al. 2011[10]    |
| 125 | FK04-5     | N 42°29'46"E 123°29'32"     | Gabbro          | SHRIMP    | 241 ± 6     | Zhang et al. 2009[40] |
| 126 | D0832-6    | N 43°15'27"E 130°59'51"     | High-Mg Diorite | LA-ICP-MS | 241 ± 1     | Fu et al. 2010[77]    |
| 127 | PM603-10-1 | N 42°18'06"E 123°13'58"     | Granodiorite    | SHRIMP    | 241 ± 2     | Shi et al. 2020[26]   |
| 128 | FW00-122   | N 43°18'00"E 128°56'48"     | Monzogranite    | LA-ICP-MS | 240 ± 2     | Wu et al. 2011[10]    |
| 129 | D0849-1    | N 43°12'52"E 130°53'17"     | High-Mg Diorite | LA-ICP-MS | 240 ± 1     | Fu et al. 2010[77]    |
